# Supplementary material for: Lignin Extracted from Various Parts of Castor (Ricinus communis L.) Plant: Structural Characterization and Catalytic Depolymerization
Source: MDPI journal article supplement (doi:10.3390/polym15122732), 2023-06-19
Supplement: s1 [file s1]

## Supplementary Materials

# Lignin Extracted from Various Parts of Castor (*Ricinus communis* L.) Plant: Structural Characterization and Catalytic Depolymerization

Yihan Wang <sup>1,†</sup>, Shihao Su <sup>1,†</sup> and Guoyong Song <sup>1,2,\*</sup>

<sup>1</sup> Beijing Key Laboratory of Lignocellulosic Chemistry, Beijing Forestry University, Beijing 100083, China; y.wang7@outlook.com (Y.W.); sushihao1994@126.com (S.S.)

<sup>2</sup> Engineering Research Center of Forestry Biomass Materials and Energy, Ministry of Education, Beijing Forestry University, Beijing 100083, China

\* Correspondence: songg@bjfu.edu.cn

† These authors contributed equally to this work.

**Table S1.** The contents of acid insoluble lignin (AIL), acid soluble lignin (ASL), total lignin content (TLC), cellulose, hemicellulose and extraction of the various raw materials.<sup>a</sup>

| Samples  | AIL  | ASL | TLC               | Cellulose | Hemicellulose | Extraction |
|----------|------|-----|-------------------|-----------|---------------|------------|
| Endocarp | 59.5 | 1.1 | 13.3 <sup>b</sup> | 19.3      | 10.6          | 9.1        |
| Ericarp  | 14.4 | 2.4 | 16.8              | 42.1      | 27.2          | 2.5        |
| Stalk    | 19.0 | 2.0 | 21.0              | 46.2      | 24.0          | 3.1        |
| Root     | 21.8 | 3.9 | 25.7              | 44.7      | 19.5          | 3.8        |
| Leaf     | 12.2 | 1.6 | 13.8              | 35.5      | 19.0          | 6.8        |
| Petiole  | 8.9  | 2.2 | 11.1              | 37.7      | 17.7          | 4.5        |

<sup>a</sup> The compositions of biomass were analyzed according to the procedures of the NREL method. <sup>b</sup> Based on the dilute HCl in 1,4-dioxane method.

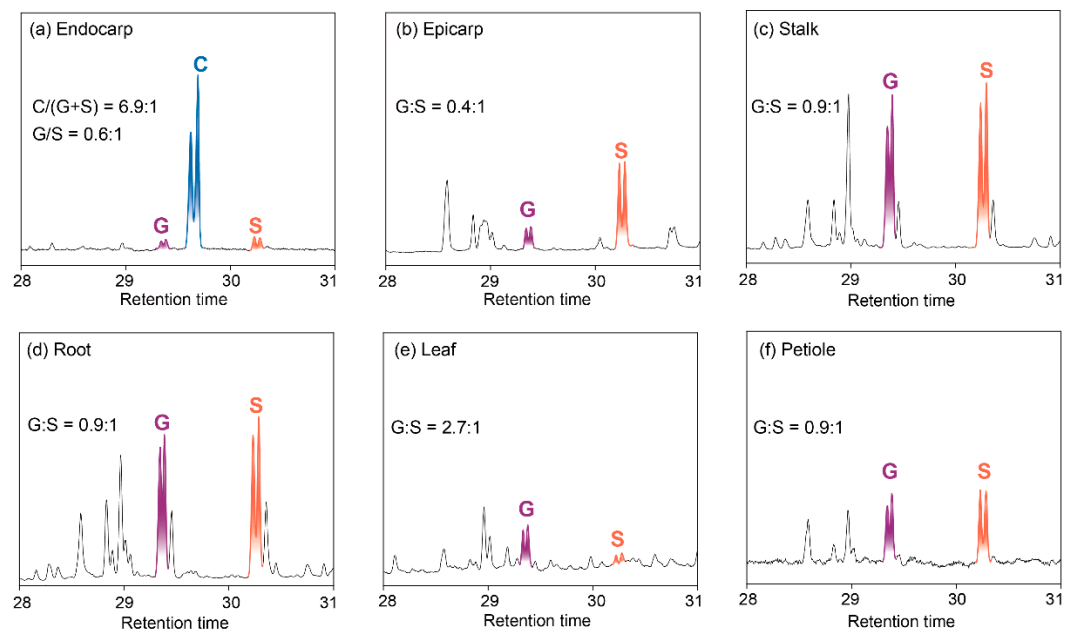

**Figure S1.** GC spectra of thioacidolysis products from different parts of castor.

**Table S2.** The contents of acid insoluble lignin (AIL), acid soluble lignin (ASL), total lignin content (TLC), cellulose, and hemicellulose of the various DL samples.

| Samples  | AIL  | ASL | TLC  | Cellulose | Hemicellulose | Total |
|----------|------|-----|------|-----------|---------------|-------|
| Endocarp | 85.0 | 1.6 | 86.6 | 3.4       | 2.9           | 92.9  |
| Epicarp  | 62.8 | 6.2 | 69.0 | 3.1       | 2.3           | 74.4  |
| Stalk    | 75.3 | 1.4 | 76.7 | 8.2       | 1.6           | 86.5  |
| Root     | 70.3 | 3.3 | 73.6 | 7.1       | 0.5           | 81.2  |
| Leaf     | 52.0 | 6.4 | 58.4 | 5.9       | 3.5           | 67.8  |
| Petiole  | 57.2 | 6.0 | 63.2 | 6.2       | 2.0           | 71.4  |

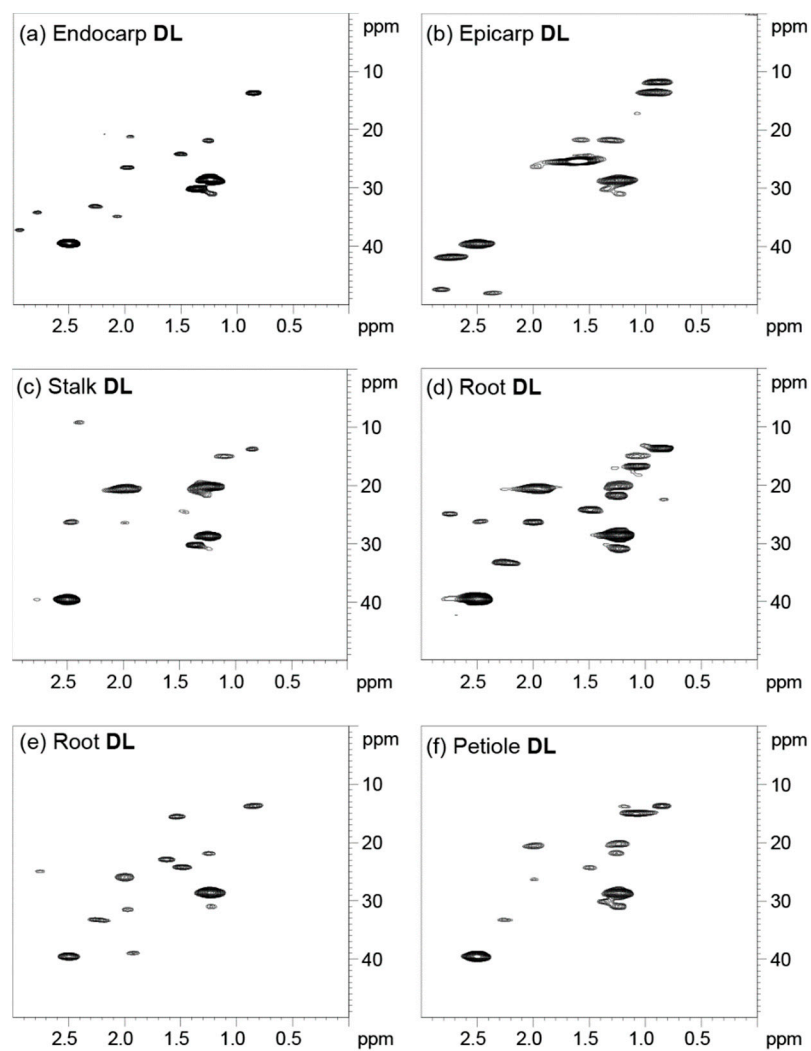

**Figure S2.** 2D NMR spectra of different DL samples.

**Table S3.** NMR data for the signal assignments for DL samples from various parts of castor in DMSO-*d*<sub>6</sub>.

| Label                                            | $\delta_C/\delta_H$ (ppm)             | Assignment                                                                                                               |
|--------------------------------------------------|---------------------------------------|--------------------------------------------------------------------------------------------------------------------------|
| I <sub>α</sub>                                   | 75.6/4.93                             | C <sub>α</sub> -H <sub>α</sub> in benzodioxane substructures (I)                                                         |
| I <sub>β</sub>                                   | 78.2/4.13                             | C <sub>β</sub> -H <sub>β</sub> in benzodioxane substructures (I)                                                         |
| I <sub>γ</sub>                                   | 60.1/3.29-3.76                        | C <sub>γ</sub> -H <sub>γ</sub> in benzodioxane substructures (I)                                                         |
| II <sub>α</sub>                                  | 84.5/4.62                             | C <sub>α</sub> -H <sub>α</sub> in β-β resinol substructures (II)                                                         |
| II <sub>β</sub>                                  | 53.4/3.04                             | C <sub>β</sub> -H <sub>β</sub> in β-β resinol substructures (II)                                                         |
| II <sub>γ</sub>                                  | 70.7/3.74-4.09                        | C <sub>γ</sub> -H <sub>γ</sub> in β-β resinol substructures (II)                                                         |
| III <sub>α</sub>                                 | 71.4/4.89                             | C <sub>α</sub> -H <sub>α</sub> in β-O-4 substructures (III)                                                              |
| III <sub>β</sub>                                 | 86.4/4.15                             | C <sub>β</sub> -H <sub>β</sub> in β-O-4 substructures (III)                                                              |
| III <sub>γ</sub>                                 | 60.8/3.21-3.95                        | C <sub>γ</sub> -H <sub>γ</sub> in β-O-4 substructures (III)                                                              |
| IV <sub>α</sub>                                  | 86.5/5.48                             | C <sub>α</sub> -H <sub>α</sub> in phenylcoumaran (IV)                                                                    |
| IV <sub>β</sub>                                  | 53.2/3.47                             | C <sub>β</sub> -H <sub>β</sub> in phenylcoumaran (IV)                                                                    |
| IV <sub>γ</sub>                                  | 62.3/3.88                             | C <sub>γ</sub> -H <sub>γ</sub> in phenylcoumaran (IV)                                                                    |
| X <sub>α</sub>                                   | 127.9/6.42                            | C <sub>α</sub> -H <sub>α</sub> in cinnamyl alcohol end-units (X)                                                         |
| X <sub>β</sub>                                   | 128.7/6.20                            | C <sub>β</sub> -H <sub>β</sub> in cinnamyl alcohol end-units (X)                                                         |
| X <sub>γ</sub>                                   | 61.4/4.10                             | C <sub>γ</sub> -H <sub>γ</sub> in cinnamyl alcohol end-units (X)                                                         |
| G <sub>2</sub>                                   | 110.7/6.92                            | C <sub>2</sub> -H <sub>2</sub> in guaiacyl units (G)                                                                     |
| G <sub>5</sub>                                   | 114.5/6.68                            | C <sub>5</sub> -H <sub>5</sub> in guaiacyl units (G)                                                                     |
| G <sub>6</sub>                                   | 119.0/6.77                            | C <sub>6</sub> -H <sub>6</sub> in guaiacyl units (G)                                                                     |
| S <sub>2/6</sub>                                 | 103.5/6.68                            | C <sub>2/6</sub> -H <sub>2/6</sub> in syringyl units (S)                                                                 |
| S' <sub>2/6</sub>                                | 106.2/7.3                             | C <sub>2/6</sub> -H <sub>2/6</sub> in oxidized syringyl units (S')                                                       |
| <i>p</i> CA <sub>3/5</sub>                       | 115.5/6.76                            | C <sub>3/5</sub> -H <sub>3/5</sub> in <i>p</i> -coumarate ( <i>p</i> CA)                                                 |
| <i>p</i> CA <sub>2/6</sub>                       | 130.5/7.45                            | C <sub>2/6</sub> -H <sub>2/6</sub> in <i>p</i> -coumarate ( <i>p</i> CA)                                                 |
| <i>p</i> CA <sub>7</sub>                         | 144.6/7.47                            | C <sub>7</sub> -H <sub>7</sub> in <i>p</i> -coumarate ( <i>p</i> CA)                                                     |
| <i>p</i> CA <sub>8</sub>                         | 113.9/6.22                            | C <sub>8</sub> -H <sub>8</sub> in <i>p</i> -coumarate ( <i>p</i> CA)                                                     |
| I <sub>2</sub> , I <sub>5</sub> , I <sub>6</sub> | 115.9/6.80, 117.6/6.94,<br>119.8/6.90 | C <sub>2</sub> -H <sub>2</sub> , C <sub>5</sub> -H <sub>5</sub> , C <sub>6</sub> -H <sub>6</sub> , in catechol units (I) |

**Table S4.** Typical chemical shifts and integration regions for DL samples from various parts of castor in the <sup>31</sup>P NMR spectrum.

| Structure                             | $\delta$ (ppm) |
|---------------------------------------|----------------|
| Aliphatic OH                          | 145.4–150      |
| Condensed Guaiacyl OH                 | 141.42–142.17  |
| Noncondensed Guaiacyl OH              | 138.79–140.17  |
| Condensed Syringyl OH                 | 143.2–144.5    |
| Noncondensed Syringyl OH              | 142.17–143.2   |
| <i>p</i> -coumarate ( <i>p</i> CA) OH | 136.7–137.8    |
| Catechol OH                           | 138.0–140.0    |
| Carboxylic group                      | 134.2–135.5    |

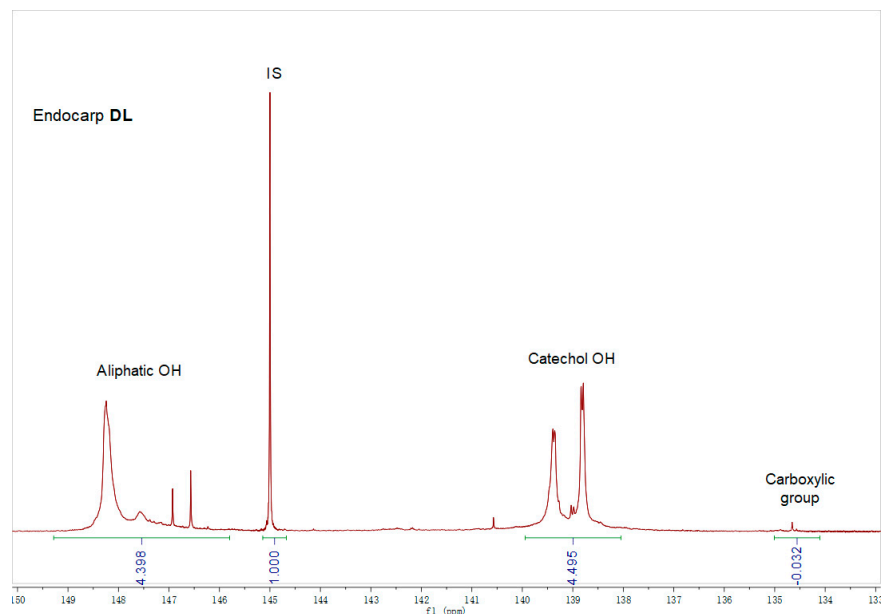

**Figure S3.** Quantitative  $^{31}\text{P}$  NMR spectrum of the Endocarp DL sample.

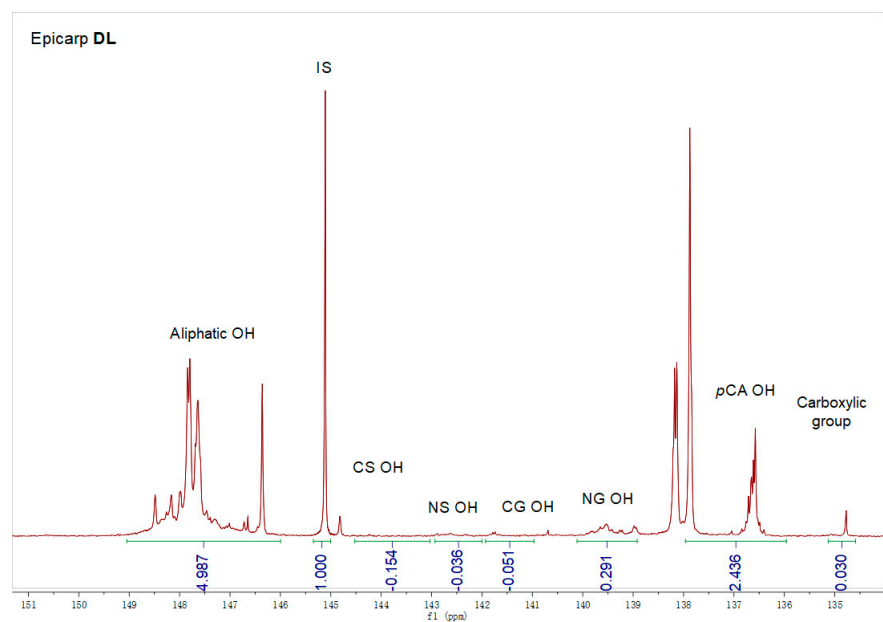

**Figure S4.** Quantitative  $^{31}\text{P}$  NMR spectrum of the Epicarp DL sample.

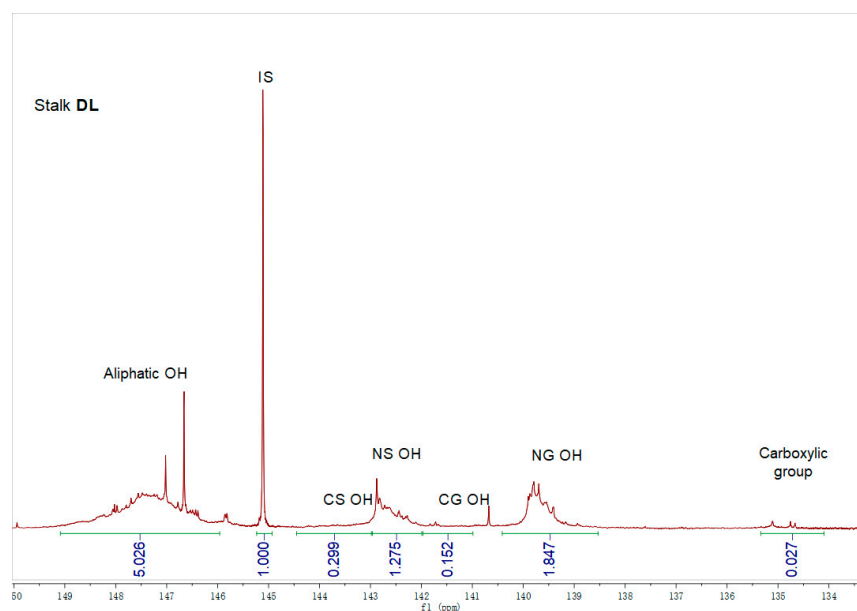

**Figure S5.** Quantitative  $^{31}\text{P}$  NMR spectrum of the Stalk DL sample.

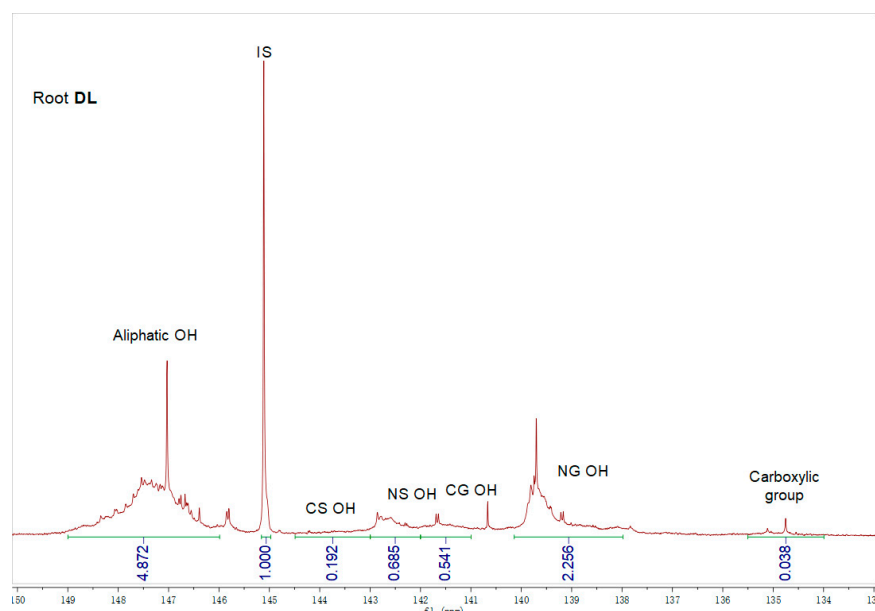

**Figure S6.** Quantitative  $^{31}\text{P}$  NMR spectrum of the Root DL sample.

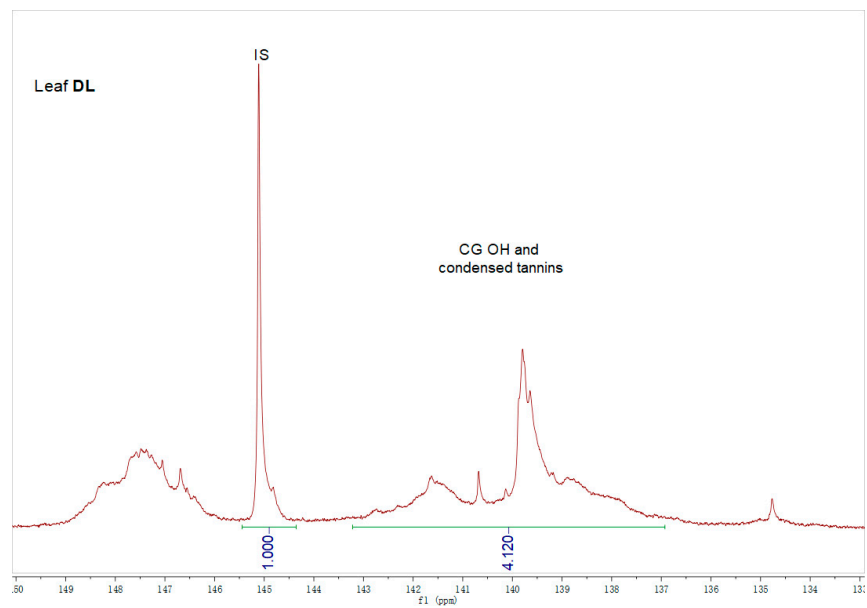

**Figure S7.** Quantitative  $^{31}\text{P}$  NMR spectrum of the Leaf DL sample.

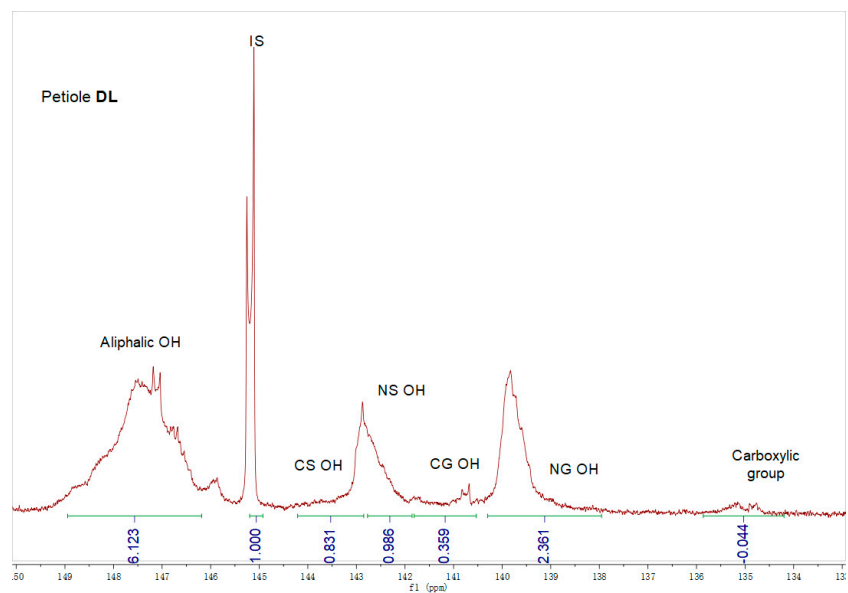

**Figure S8.** Quantitative  $^{31}\text{P}$  NMR spectrum of the Petiole DL sample.

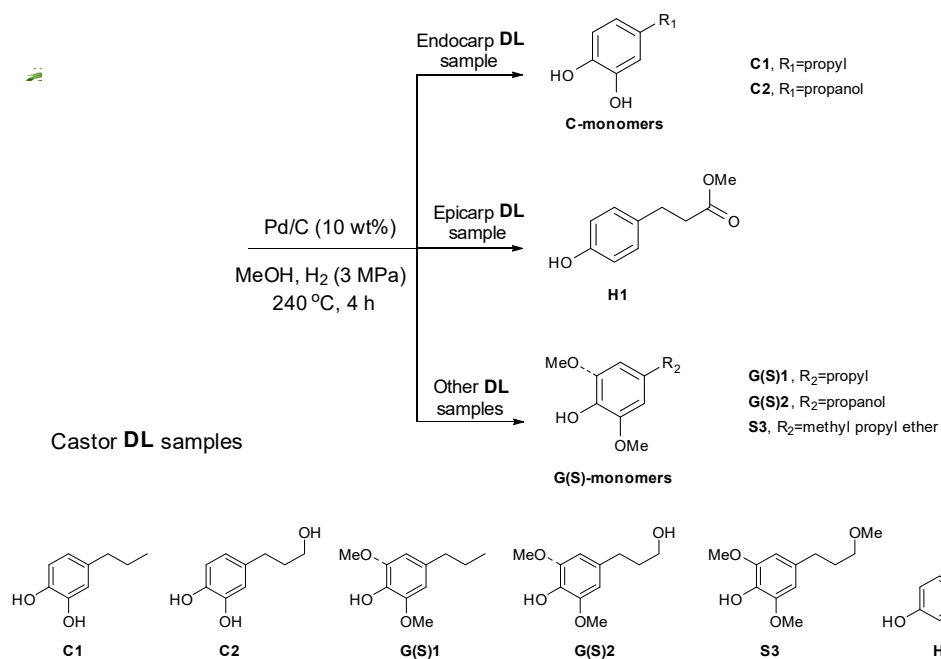

**Figure S9.** Products distribution of Pd/C-catalyzed depolymerization of various castor DL samples.

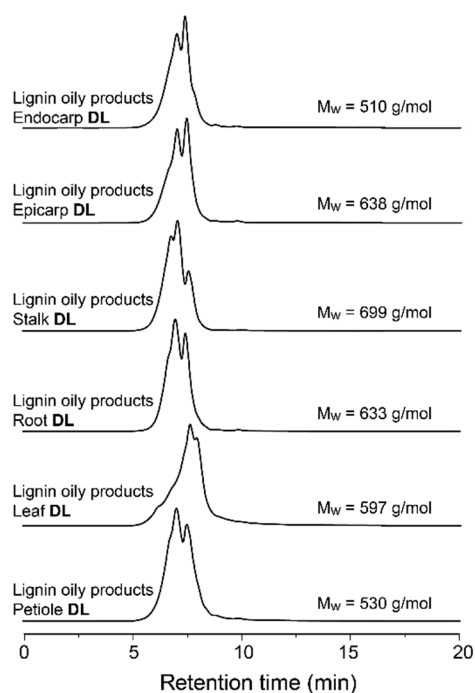

**Figure S10.** GPC spectra of lignin oily products from Pd/C-catalyzed hydrogenolysis of various DL samples of castor plants. Reaction conditions: sample (50 mg), Pd/C (10 mg), MeOH (10 mL), H<sub>2</sub> (3 MPa), 240 °C, 4 h.
